# Supplementary material for: LanCL proteins are not Involved in Lanthionine Synthesis in Mammals
Source: PubMed Central journal article supplement (PMC5247676; doi:10.1038/srep40980), 2017-01-20
Supplement: srep40980-s1.pdf [file srep40980-s1.pdf]

## SUPPLEMENTARY INFORMATION

### LanCL proteins are not involved in lanthionine synthesis in mammals

Chang He<sup>1</sup>, Min Zeng<sup>2</sup>, Debapriya Dutta<sup>1</sup>, Tong Hee Koh<sup>1</sup>,

Jie Chen<sup>2\*</sup>, and Wilfred A. van der Donk<sup>1\*</sup>

<sup>1</sup>Department of Chemistry and Howard Hughes Medical Institute, University of Illinois at Urbana-Champaign, Urbana, Illinois, United States of America

<sup>2</sup>Department of Cell and Developmental Biology, University of Illinois at Urbana-Champaign, Urbana, United States of America

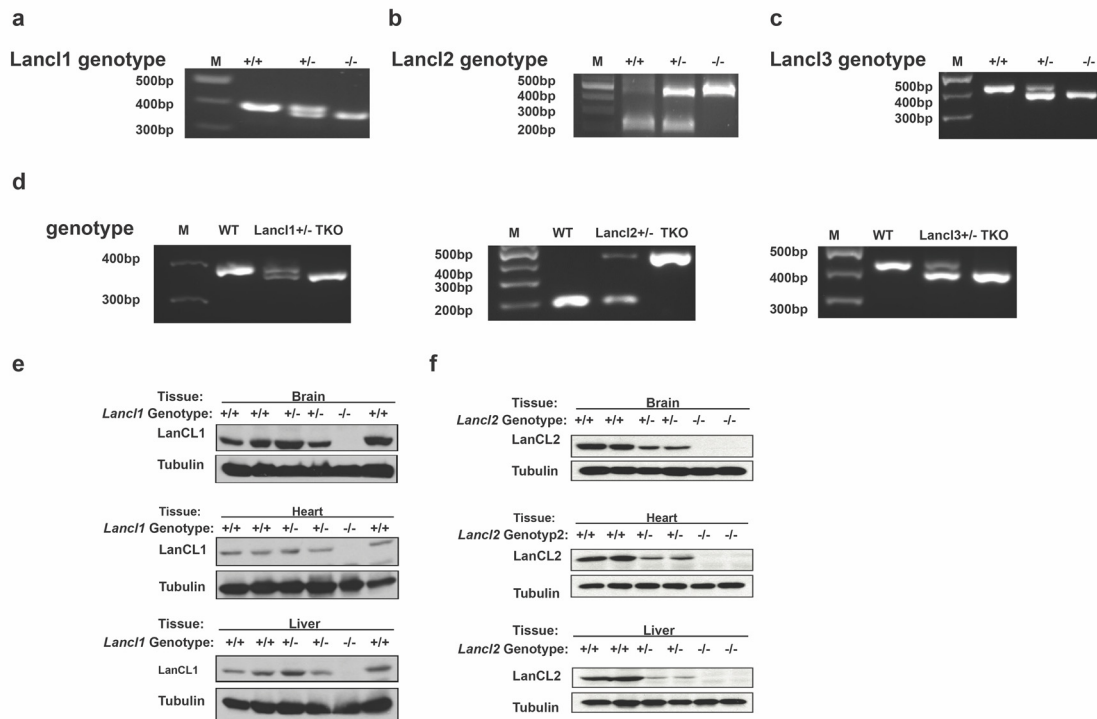

**Supplementary Figure S1. LanCL1 KO mice genotyping and KO confirmation.** (a-c) Genotyping results of single KO mice. Genotyping of (a) Lancl1<sup>-/-</sup>, (b) Lancl2<sup>-/-</sup> and (c) Lancl3<sup>-/-</sup> confirmed the generation of the corresponding single KO mice. For visualization purposes, a mixture of Lancl<sup>-/-</sup> and WT extracted DNA was used as Lancl<sup>+/-</sup> in panels a-c. (d) genotyping of TKO mice showed the complete deletion of all three Lancl genes. (e-f) Protein was extracted from brain, heart and liver tissue of Lancl1<sup>-/-</sup>, Lancl2<sup>-/-</sup> and wild type mouse with matched age and gender and subjected to western blotting. The complete deletion of LanCL proteins is seen in homozygous mice tissues.

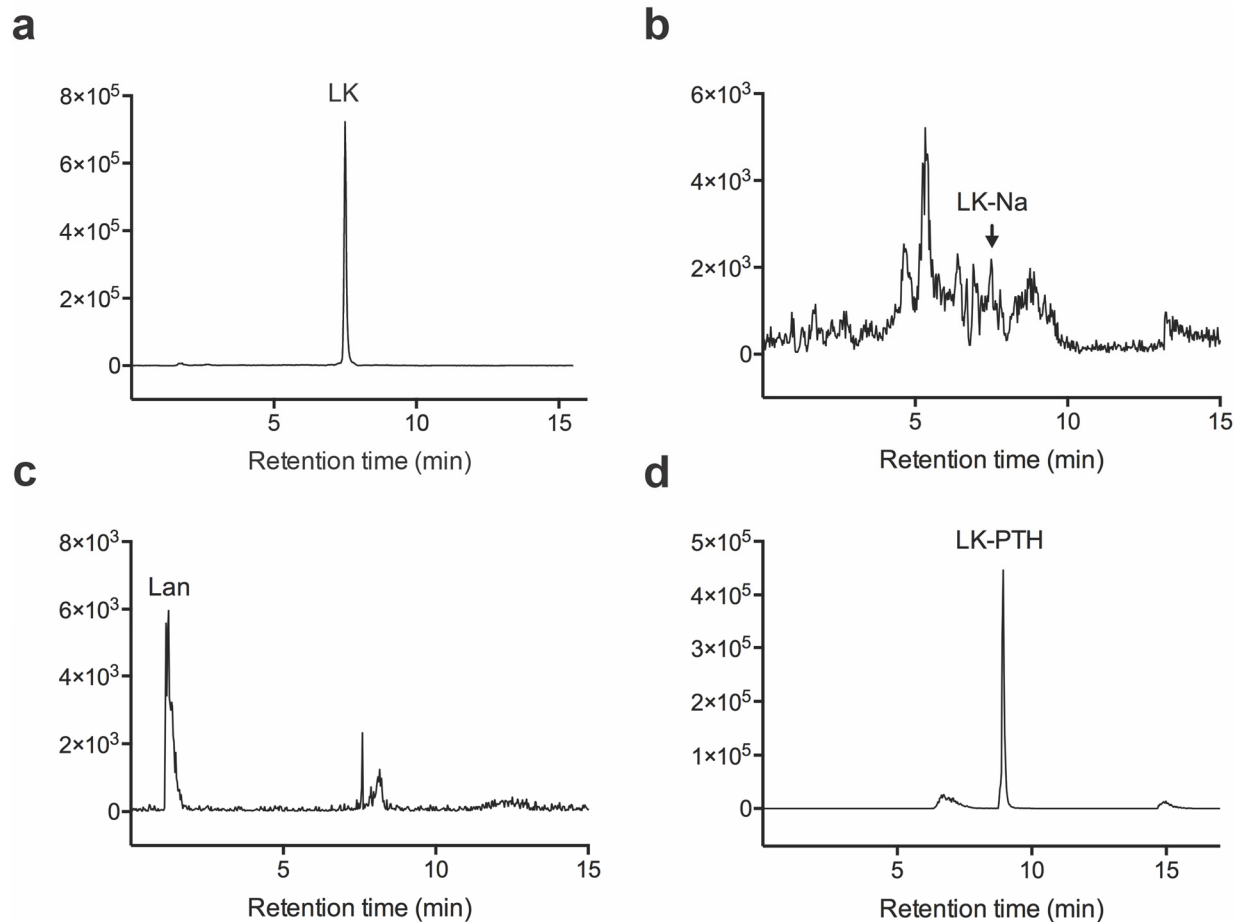

**Supplementary Figure S2. MRM chromatograms of LK and related metabolites in WT mouse brain.** WT mouse brain was homogenized and deproteinated. The supernatant was completely dried under  $N_2$  flow and dissolved in 400  $\mu$ L of 30% acetonitrile. An aliquot of 5  $\mu$ L was injected for LC/MS/MS analysis of LK, LK-Na and Lan. LK-PTH was from the HPLC fraction corresponding to the PITC derivatized endogenous LK in WT mouse brain. **(a)** MRM chromatogram of detected LK (transition of 190.1  $\rightarrow$  73.1). **(b)** MRM chromatogram of detected LK-Na (transition of 212.0  $\rightarrow$  168.1). **(c)** MRM chromatogram of detected Lan (transition of 202.0  $\rightarrow$  120.0). **(d)** MRM chromatogram of detected LK-PTH (transition of 307.1  $\rightarrow$  126.1).

**a**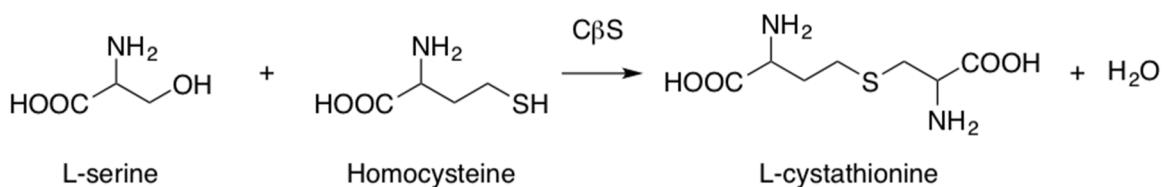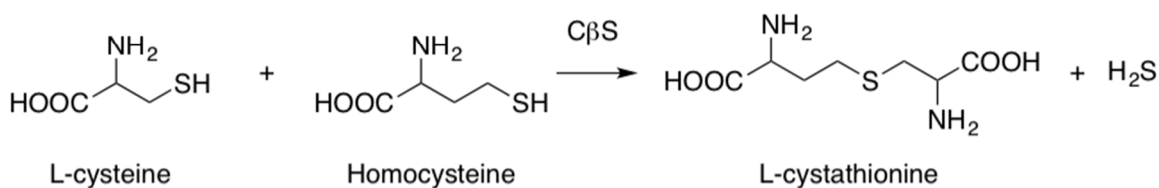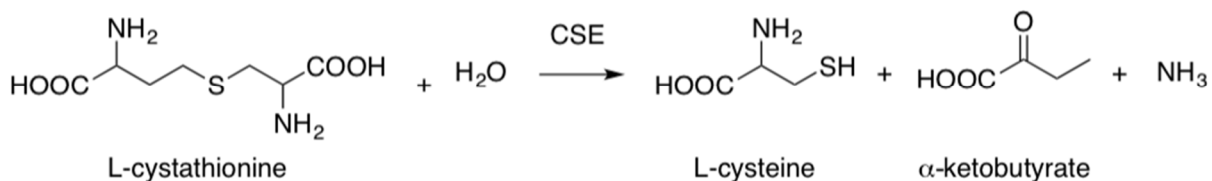**b**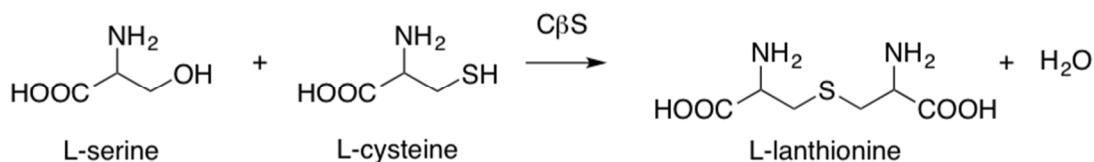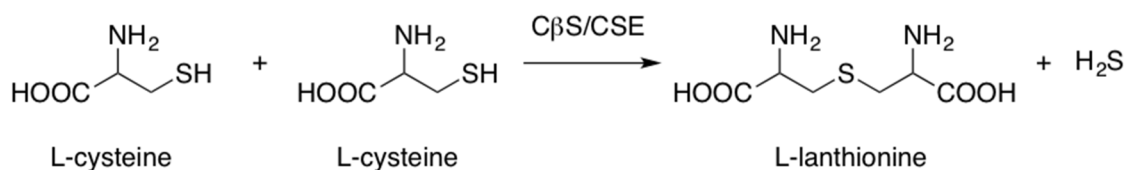

**Supplementary Figure S3. Lanthionine formation through alternative reactions in the transsulfuration pathway. (a)** The classic transsulfuration pathway catalyzed by C $\beta$ S and CSE. **(b)** Alternative reactions catalyzed by C $\beta$ S or CSE that lead to lanthionine formation. When the substrates are two molecules of cysteine, H<sub>2</sub>S is formed instead of H<sub>2</sub>O.
